# Supplementary material
Source: PubMed Central journal article supplement (PMC4289617)
Supplement: NIHMS651061-supplement-Supplementary_Data.pdf [file NIHMS651061-supplement-Supplementary_Data.pdf]

**Analysis of the binding of Mixed Lineage Leukemia 1 (MLL1) and Histone 3 peptides to WD Repeat Domain 5 (WDR5) for the design of inhibitors targeting**

**MLL1-WDR5 interaction**

Hacer Karatas<sup>+¥Δ</sup>, Elizabeth Townsend<sup>#</sup>, Denzil Bernard<sup>¥Δ</sup>, Yali Dou<sup>#</sup> and Shaomeng Wang<sup>+¥\$Δ\*</sup>

Departments of <sup>+</sup>Medicinal Chemistry, <sup>¥</sup>Internal Medicine, <sup>#</sup>Pathology, <sup>\$</sup>Pharmacology and

<sup>Δ</sup>Comprehensive Cancer Center, University of Michigan, Ann Arbor, Michigan 48109, USA

**Supporting Information**

Table S1----- S2-S3

**Table S1.** Characterization data of synthesized peptides.

| Peptide                | % Purity<br>analytical RP-(HPLC)* | Calculated    | Observed<br>(ESI-MS)** |
|------------------------|-----------------------------------|---------------|------------------------|
|                        |                                   | $(M+2H)^{2+}$ |                        |
| WIN-FAM-1              | > 99                              | 1026.009      | 1026.20                |
| WIN-FAM-2              | 99                                | 1032.538      | 1032.60                |
|                        |                                   | $(M+H)^+$     |                        |
| 10mer-Ala-FAM          | 98                                | 1920.013      | 1919.87                |
| 10mer-Thr-FAM          | 99                                | 1950.024      | 1949.87                |
| WIN                    | 95                                | 1351.756      | 1351.73                |
| Ac-11mer               | > 99                              | 1294.734      | 1294.80                |
| Ac-10mer               | 90                                | 1207.702      | 1207.73                |
| NH <sub>2</sub> -11mer | > 99                              | 1252.724      | 1252.80                |
| Ac- 9mer               | 98                                | 1136.665      | 1136.73                |
| Ac-7mer                | 96                                | 836.474       | 836.53                 |
| Ac-6mer                | 97                                | 723.390       | 723.53                 |
| Ac-5mer                | 99                                | 586.331       | 586.47                 |
| Ac-4mer                | 93                                | 487.263       | 487.40                 |
| Ac-3mer                | 96                                | 358.220       | 358.33                 |
| Ac-2mer                | > 99                              | 287.183       | 287.27                 |
| NH <sub>2</sub> -10mer | 98                                | 1165.692      | 1165.73                |
|                        |                                   |               |                        |

|                            |      |          |         |
|----------------------------|------|----------|---------|
| NH <sub>2</sub> -3mer      | > 99 | 316.210  | 316.27  |
| CHO-ARA                    | > 99 | 344.205  | 344.27  |
| Δ1                         | > 99 | 372.236  | 372.33  |
| Δ2a                        | 95   | 372.236  | 372.33  |
| Δ2b                        | > 99 | 386.252  | 386.33  |
| Δ2c                        | 95   | 373.220  | 373.33  |
| H3-10mer                   | > 99 | 1145.687 | 1145.80 |
| Ac-H3-10mer                | > 99 | 1187.697 | 1187.73 |
| H3-3mer                    | 93   | 346.220  | 346.27  |
| Ac-H3-3mer                 | 95   | 388.231  | 388.33  |
| H3-10mer-K4Me              | > 99 | 1159.702 | 1159.80 |
| H3-10mer-K4Me <sub>2</sub> | > 99 | 1173.718 | 1173.80 |
| H3-10mer-K4Me <sub>3</sub> | > 99 | 1188.741 | 1187.80 |

\* Waters, Sunfire™ C18, 4.6×150mm, 5μm.

\*\* Finnigan LCQ Deca (Thermoquest).
